# Supplementary material for: Associations between Forkhead Box O1 (FoxO1) Expression and Indicators of Hepatic Glucose Production in Transition Dairy Cows Supplemented with Dietary Nicotinic Acid
Source: PubMed Central journal article supplement (PMC4723333; doi:10.1371/journal.pone.0146670), 2016-01-22
Supplement: pone.0146670.s004.pdf [file pone.0146670.s004.pdf]

**S4 Table. Results of the sequencing of PCR products and BLAST analysis<sup>1</sup>.**

| Symbol | Sequence results of PCR products                                                                                                                                                                                                                                                       | BLAST hit gene (NCBI) description                                                             | Identities |
|--------|----------------------------------------------------------------------------------------------------------------------------------------------------------------------------------------------------------------------------------------------------------------------------------------|-----------------------------------------------------------------------------------------------|------------|
| FoxO1  | CATTCTGCACGCGGATGAACTTGCTGTGCAGGGACAGATTATGACGAATTGA<br>ATTCTTCCAGCCCCTGAGCTGTTGCTGTCGCCCTATCCTTGAAGTAGGGCA<br>CGCTCTTGACCATCCACTCGTAAATCTGCG                                                                                                                                          | PREDICTED: Bos taurus forkhead box O1 (FOXO1), transcript variant X2, mRNA                    | 135/135    |
| G6P    | AGCAGGTGTATACTATGTGATGGTCACATCCACCCTCTCTATCTTTCGTGGAA<br>AGAAAAAGCCAACCTACAGATTTCCGGTGCTTGAATGTCATGTTGTGGTTGGG<br>ATTCTGGGTCTGTGCAACTGAA                                                                                                                                               | Bos taurus glucose-6-phosphatase, catalytic subunit (G6P), mRNA                               | 126/126    |
| SLC2A2 | GAGAGGCATATCAGGACTCTACTGTGGGTGATTTCAGGCTTGATTCCAATG<br>TACATTGGTGAAATTGCTCCAACCACACTCAGGGGCGCTATCGGTGCTCTTC<br>ATCAGCTGGCCATTGTCACGGGCATTCTTATTAGTCAGATCGTTGGCCTGAC<br>TTTATCCTGGGCA                                                                                                   | Bos taurus solute carrier family 2 (facilitated glucose transporter), member 2 (SLC2A2), mRNA | 169/169    |
| IRA    | AAGATTACCTGCACAACGTGGTTTTTCATCCCCAGGCCTTCAAGGAGCTGGAG<br>GAGTTGAT                                                                                                                                                                                                                      | PREDICTED: Bos taurus insulin receptor (INSR), transcript variant X8, mRNA                    | 44/45      |
| IRB    | GTCTTCAAGGAGCTGGAGGAGTCCCTCGTTTCAGGAAAAACGTTTGAAGATACC<br>TGCACAACGTGGTTCTCATCCCCAGAAAATCATCTTCAGGCCCTGTTGCCGA<br>GGACGCTAAATT                                                                                                                                                         | Bos taurus insulin receptor (INSR), transcript variant X6, mRNA                               | 106/108    |
| PC     | CAGCTGCGCACCCGGCTCACTAGCGACTCCGTCAAGCTTGCAAAGCAGGTGG<br>GCTACGAGAACGCGGGCACCGTGGAGTTCCTGGTGGACAGGCACGGCAAGC<br>ACTACTTCATCGAGGTCAACTCGCGCTGCAGGTGGAGCACACGGTGACCGA<br>GGAGATCACAGATGTGGACCTGGTCCACGCCAGATCCACGTGGCCGAGGG<br>CCGGAGCCTGCCTGACCTGGGCCTCCGGCAGGAGAACATCCGCATCAACCAG<br>CT | Bos taurus pyruvate carboxylase, mRNA                                                         | 254/255    |
| PCCA   | TGGTCTGACTAAATGTGACCAGCACGTGGAACCTGGCTTACCCTTGTGTC<br>TGTC AACGTTGATGGCACTCAGAGGACGATACAGTGTCTTCTCGAGAAGCA<br>GGGGGCAACATGAGCATTTCAGTTTCTCGGCACAGTAA                                                                                                                                   | Bos taurus propionyl CoA carboxylase, alpha polypeptide (PCCA), mRNA                          | 139/141    |
| PCK1   | AGGACGGCAGCTGCTGAGCCACATGGAGGAGGAGGGTGTGATCAAGAGGCT<br>GAAGAAGTATGACAACCTGCTGGTTGGCTCTCACTGACCCAGGGATGTGGCC<br>AGAATTGAAAGCAAGACGGTCATCATCACTCGAGAGCAAAGAGATACGGTG<br>CCCATCAATT                                                                                                       | Bos taurus phosphoenolpyruvate carboxykinase 1 (soluble) (PCK1), mRNA                         | 156/156    |
| PYGL   | AGTTCTGGAGAGGAGTACAAAAGTGAAGATCAACCCGTCCTCCATGTTTCGACG<br>TGCAGGTGAAAGCGGATCCACGAGTACAAGCGACAGCTCCTGAACTGCCTGC<br>ACGTGGTCACCATGTACAACCGCATTAAGAAAAGACCCAAAGAAG                                                                                                                        | Bos taurus phosphorylase, glycogen, liver (PYGL), mRNA                                        | 146/149    |

**S4 Table. (continued)**

| Symbol | Sequence results of PCR products                                                                                                                                                                                                                       | BLAST hit gene (NCBI) description                                                 | Identities |
|--------|--------------------------------------------------------------------------------------------------------------------------------------------------------------------------------------------------------------------------------------------------------|-----------------------------------------------------------------------------------|------------|
| RPL19  | AATTCTGCGCCGGCTGCTTAGACGATACCGTGAATCTAAGAAGATTGACCGC<br>CACATGTATCACAGCCTGTACCTGAAGGTGAAGGGTAACGTGTTCAAAAACA<br>AGCGGATCCTCATGGAACATATCCACAAGCTGAAGGCAGACAAAGTGGTGC<br>GC                                                                              | Bos taurus ribosomal protein L19 (RPL19), mRNA                                    | 147/147    |
| RPL32  | TCATTAGGCATCAATCAGACCGATATGTCAAAATCAAGCGGAACTGGCGGA<br>AGCCCAGAGGCATTGACAACAGGGTGCAGAGAAGATTCAAGGGCCAGATCT<br>TGATGCCCAACATTGGTTATGGGAGCAACAAGAAAACCAAGCACATGCTGC<br>CCAGCGGCTTCCGGAAGTTCCTGGTCCACAACGTCAAACCTCTTC                                     | Bos taurus ribosomal protein L32 (RPL32), mRNA                                    | 190/190    |
| RBMS2  | CAGCAGTGGGAGCACTGCACATGACCAGCTGAGTAAGACCAACCTCTACATC<br>CGGGGATTGCAGCCAAGCACTACTGACCAGGACCTAGTGAAGTTGTGTCAGT<br>CATACGGCAAGATTGTCTCCACTAAGGCCATCCTGGACAAGACCACAAACAA<br>GTGCAAAGGCTATGGCTTTGTGGACTTCGACAGTCCTTCAGCAGCACAGAAA<br>GCAGTGAATTT            | Bos taurus RNA binding motif, single stranded interacting protein 2 (RBMS2), mRNA | 213/213    |
| MRPL39 | ACTGACCCTGGCACTATCTTTGTGTTGAATAAAAACGTTTCCACTCCTTATAG<br>CTGTGCCATGCATTTAAGTGAGTGGTACTGCAGGAAGTCTATTCTGGCTCTTG<br>TGGACGGACAGCCTTGGGACATGTATAAACCTTTGACCAAGTCCTGTGAAAT<br>TAAATTTCTAACTTTCAAAGATGATGATCCAGGAGAAGTCAATAAGGCTTAT<br>TGGCGTTCTTGTGCCATATT | Bos taurus mitochondrial ribosomal protein L39 (MRPL39), mRNA                     | 225/225    |
| UXT    | GGCAGAGCTCTCAGTTCATTGATCGTAAGAGCAGTCTCCTCACAGAGCTCAG<br>CGACAACATGG                                                                                                                                                                                    | Bos taurus ubiquitously-expressed transcript (UXT), mRNA                          | 59/61      |
| MRPS15 | CCTGGAGGCTCAATTGTTGCCTTGACTGTCAAGATCCGCAGTTACGAAGAAC<br>ACATGCAGAAACATCAAAGGACAAAGCCCACAAGCGCTATCTGCTGATGA<br>GCAAGTTG                                                                                                                                 | Bos taurus mitochondrial ribosomal protein S15 (MRPS15), mRNA                     | 106/107    |
| RPS9   | GGTGCCCGGGAGCTGCTGACGCTGGATGAGAAAGACCCGCGGCGTCTGTTCG<br>AAGGTAATGCCCTGTTGCGGGCGCTCGTCCGTATCGGGGTGCTGGATGAGGG<br>CAAGATGAAGCTGGATTACATCCTGGGAAGGGCTTC                                                                                                   | Bos taurus ribosomal protein S9 (RPS9), mRNA                                      | 131/132    |
